# Supplementary material
Source: PubMed Central journal article supplement (PMC7996643)
Supplement: piaa023_suppl_supplementary_figure_2.pdf [file piaa023_suppl_supplementary_figure_2.pdf]

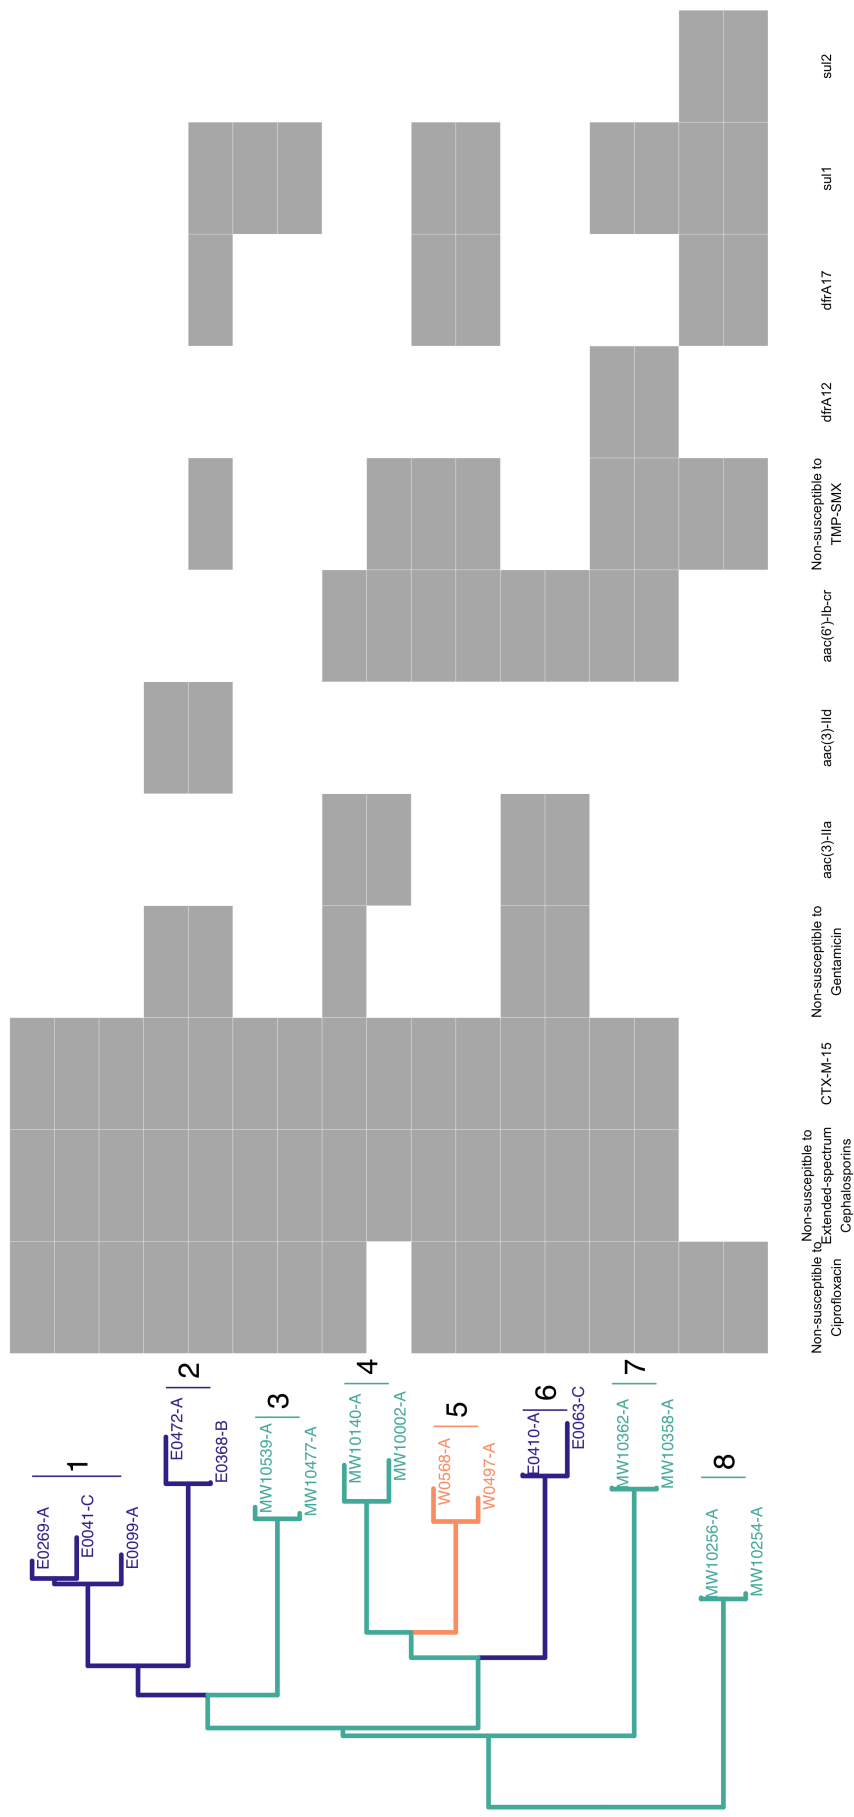

**Supplementary Figure 2: Phylogeny of 8 identified putative clusters of *E. coli* ST131-H30 colored by study site. Heatmap to the right of the phylogeny shows selected antibiotic susceptibilities and the presence or absence of associated antibiotic resistance genetic determinants.**
