# Supplementary material
Source: PubMed Central journal article supplement (PMC7996643)
Supplement: piaa023_suppl_supplementary_table_2.pdf [file piaa023_suppl_supplementary_table_2.pdf]

**Supplementary Table 2: Selected clinical characteristics of individuals included in putative clusters of *E. coli* ST131-H30.**

| ID        | Putative cluster | Age  | Sex    | Isolate collection Site | Underlying medical condition categories | Hospitalized in the previous 6 months | Hospitalized at the time of infection | Antibiotics in the previous 30 days |
|-----------|------------------|------|--------|-------------------------|-----------------------------------------|---------------------------------------|---------------------------------------|-------------------------------------|
| E0041-C   | 1                | 4.8  | Male   | Blood                   | Gastrointestinal                        | Yes                                   | No                                    | Yes                                 |
| E0099-A   | 1                | 3.5  | Female | Urine                   | Urologic                                | Yes                                   | Yes                                   | No                                  |
| E0269-A   | 1                | 10.4 | Female | Urine                   | Urologic                                | No                                    | No                                    | Yes                                 |
| E0368-B   | 2                | 1.5  | Male   | Urine                   | Pulmonary                               | Yes                                   | Yes                                   | Yes                                 |
| E0472-A   | 2                | 0.4  | Male   | Urine                   | None                                    | No                                    | Yes                                   | Yes                                 |
| MW10477-A | 3                | 1.9  | Female | Urine                   | None                                    | No                                    | No                                    | Yes                                 |
| MW10539-A | 3                | 1.9  | Female | Urine                   | None                                    | No                                    | No                                    | No                                  |
| MW10002-A | 4                | 4.3  | Female | Urine                   | Malignancy                              | Yes                                   | No                                    | Yes                                 |
| MW10140-A | 4                | 4.6  | Female | Urine                   | None                                    | Yes                                   | No                                    | No                                  |
| W0497-A   | 5                | 6.2  | Female | Urine                   | Neuromuscular                           | No                                    | No                                    | No                                  |
| W0568-A   | 5                | 1.0  | Female | Urine                   | None                                    | No                                    | No                                    | No                                  |
| E0063-C   | 6                | 5.9  | Female | Urine                   | Neuromuscular & Urologic                | Yes                                   | No                                    | Yes                                 |
| E0410-A   | 6                | 4.1  | Female | Urine                   | Malignancy                              | Yes                                   | Yes                                   | Yes                                 |
| MW10358-A | 7                | 2.1  | Female | Bone, surgical site     | Malignancy                              | Yes                                   | Yes                                   | Yes                                 |
| MW10362-A | 7                | 11.8 | Female | Bone, surgical site     | None                                    | No                                    | Yes                                   | No                                  |
| MW10254-A | 8                | 16.6 | Male   | Urine                   | Neuromuscular & Urologic                | No                                    | No                                    | No                                  |
| MW10256-A | 8                | 5.9  | Female | Urine                   | Neuromuscular & Urologic                | No                                    | Yes                                   | No                                  |
